# Supplementary material for: An intramodular thioesterase domain catalyses chain release in the biosynthesis of a cytotoxic virulence factor
Source: Royal Society of Chemistry journal article supplement (doi:10.1039/d2cb00121g), 2022-01-01
Supplement: d2cb00121g1.pdf [file d2cb00121g1.pdf]

## **An Intramodular Thioesterase Domain Catalyses Chain Release in the Biosynthesis of a Cytotoxic Virulence Factor**

Rory Little, Felix Trottmann, Miriam Preissler, Christian Hertweck.

DOI: 10.1039/d2cb00121g.

**Supplementary Tables 2**

**Supplementary Figures 9**

**Supplementary References 21**

## Supplementary Tables

| Organism/pathway                                        | Accession #  | Class in SSN             | Product | Domain arrangement for non-terminal TE domains |
|---------------------------------------------------------|--------------|--------------------------|---------|------------------------------------------------|
| <b>Burkholderia thailandensis</b><br>TE-A               | ABC36203     | BurA TE-A and homologues | Gonyol  | TE-A-T-KS-KR-TE-AT-ACP                         |
| <i>Micromonospora nigra</i><br>TE-A                     | WP_217628199 | BurA TE-A and homologues |         | TE-A-T-KS-KR-TE-AT-ACP                         |
| <i>Pseudomonas</i> sp Irchel s3b6<br>TE-A               | WP_095144283 | BurA TE-A and homologues |         | TE-A-T-KS-KR-TE-AT-ACP                         |
| <i>Saccharothrix syringae</i><br>TE-A                   | WP_211269021 | BurA TE-A and homologues |         | TE-A-T-KS-KR-TE-AT-ACP                         |
| <i>Streptomyces bryophytorum</i><br>TE-A                | WP_240165141 | BurA TE-A and homologues |         | TE-A-T-KS-KR-TE-AT-ACP                         |
| <i>Streptomyces glebosus</i><br>TE-A                    | WP_229894110 | BurA TE-A and homologues |         | TE-A-T-KS-KR-TE-AT-ACP                         |
| <i>Streptomyces mobaraensis</i><br>TE-A                 | WP_152263742 | BurA TE-A and homologues |         | TE-A-T-KS-KR-TE-AT-ACP                         |
| <i>Agrobacterium vitis</i><br>TE-B                      | WP_156583012 | BurA TE-B and homologues |         | TE-A-T-KS-KR-TE-AT-ACP                         |
| <b>Burkholderia thailandensis</b><br>TE-B               | ABC36203     | BurA TE-B and homologues | Gonyol  | TE-A-T-KS-KR-TE-AT-ACP                         |
| <i>Micromonospora nigra</i><br>TE-B                     | WP_217628199 | BurA TE-B and homologues |         | TE-A-T-KS-KR-TE-AT-ACP                         |
| <i>Pseudomonas</i> sp Irchel s3b6<br>TE-B               | WP_095144283 | BurA TE-B and homologues |         | TE-A-T-KS-KR-TE-AT-ACP                         |
| <i>Saccharothrix syringae</i><br>TE-B                   | WP_211269021 | BurA TE-B and homologues |         | TE-A-T-KS-KR-TE-AT-ACP                         |
| <i>Streptomyces bryophytorum</i><br>TE-B                | WP_240165141 | BurA TE-B and homologues |         | TE-A-T-KS-KR-TE-AT-ACP                         |
| <i>Streptomyces glebosus</i><br>TE-B                    | WP_229894110 | BurA TE-B and homologues |         | TE-A-T-KS-KR-TE-AT-ACP                         |
| <i>Streptomyces mobaraensis</i><br>TE-B                 | WP_152263742 | BurA TE-B and homologues |         | TE-A-T-KS-KR-TE-AT-ACP                         |
| DEBS_TEII<br><i>Saccharopolyspora erythraea</i>         | CAA42028     | Type II Thioesterase     | P       |                                                |
| Megalomicin_TEII<br><i>Micromonospora megalomicea</i>   | AAG13923     | Type II Thioesterase     | P       |                                                |
| Pikromycin_TEII<br><i>Streptomyces venezuelae</i>       | AAC69333     | Type II Thioesterase     | P       |                                                |
| Borrelidin_TEII<br><i>Streptomyces</i> sp. CRB46        | WP_019330222 | Type II Thioesterase     | P       |                                                |
| Tylosin_TEII<br><i>Streptomyces fradiae</i>             | KDS84464     | Type II Thioesterase     | P       |                                                |
| Kendomycin_TEII<br><i>Streptomyces violaceoruber</i>    | CAQ52621     | Type II Thioesterase     | P       |                                                |
| Rifamycin_TEII<br><i>Amycolatopsis mediterranei</i>     | AAG52991     | Type II Thioesterase     | P       |                                                |
| Abyssomicin_TEII<br><i>Verrucosipora maris</i>          | AEK75515     | Type II Thioesterase     | P       |                                                |
| Filipin_TEII<br><i>Streptomyces avermitilis</i>         | BAC68117     | Type II Thioesterase     | P       |                                                |
| Kijanimicin_TEII<br><i>Actinomadura kijaniata</i>       | ACB46473     | Type II Thioesterase     | P       |                                                |
| Maklamicin_TEII<br><i>Micromonospora</i> sp. GMKU326    | BAQ25498     | Type II Thioesterase     | P       |                                                |
| Tetromadurin_TEII<br><i>Actinomadura verrucosopora</i>  | QKG20162     | Type II Thioesterase     | P       |                                                |
| Tetronasin_TEII<br><i>Streptomyces longisporoflavus</i> | ACR50794     | Type II Thioesterase     | P       |                                                |
| Tetronomycin_TEII<br><i>Streptomyces</i> sp. NRRL 11266 | BAE93720     | Type II Thioesterase     | P       |                                                |
| Thiolactomycin_TEII<br><i>Salinispora pacifica</i>      | ALJ49917     | Type II Thioesterase     | P       |                                                |
| Gramicidin_TEII<br><i>Brevibacillus brevis</i>          | BAH43865     | Type II Thioesterase     | N       |                                                |

## RSC Chemical Biology

|                                                          |               |                            |    |  |
|----------------------------------------------------------|---------------|----------------------------|----|--|
| Microcystin_TEII<br><i>Planktothrix agardhii</i>         | ACA83967      | Type II Thioesterase       | N  |  |
| Versipelostatin_TEII<br><i>Streptomyces versipellis</i>  | BAQ21958      | Type II Thioesterase       | P  |  |
| Tyrocidine_TEII<br><i>Brevibacillus brevis</i>           | WP_0158910190 | Type II Thioesterase       | N  |  |
| Bacitracin_TEII<br><i>Bacillus licheniformis</i>         | WP_020452080  | Type II Thioesterase       | N  |  |
| Naphthyridinomycin_TEII<br><i>Streptomyces lusitanus</i> | AGD80621      | Type II Thioesterase       | N  |  |
| Gramicidin_TEII_N_<br><i>B.pseudomycooides</i>           | WP_006096422  | Type II Thioesterase       | N  |  |
| Xenocoumacin<br><i>Xenorhabdus nematophila</i>           | CBJ89763      | Type II Thioesterase       | PN |  |
| Griseoviridin_TEII<br><i>Streptomyces griseoviridis</i>  | AGN74877      | Type II Thioesterase       | PN |  |
| Microtermolide_TEII<br><i>Streptomyces</i> sp. SID8354   | WP_018540598  | Type II Thioesterase       | PN |  |
| Spiruchostatin_TEII<br><i>Pseudomonas</i> sp. Q71576     | AFR69340      | Type II Thioesterase       | PN |  |
| Gramicidin_TEII<br><i>Bacillus pseudomycooides</i>       | WP_006096422  | Type II thioesterase       | N  |  |
| Soraphen_TEI<br><i>Streptomyces</i> sp. Sp080513GE-23    | AAA79984      | Type I thioesterase domain | P  |  |
| Amphotericin_TEI<br><i>Sorangium cellulosum</i>          | AAK73503      | Type I thioesterase domain | P  |  |
| Lasalocid_TEI<br><i>Streptomyces lasalocidi</i>          | BAG85032      | Type I thioesterase domain | P  |  |
| Spinosyn_TEI<br><i>Saccharopolyspora spinosa</i>         | AAG23262      | Type I thioesterase domain | P  |  |
| Spirangien_TEI<br><i>Sorangium cellulosum</i>            | CAD43451      | Type I thioesterase domain | P  |  |
| Avermectin_TEI<br><i>Streptomyces avermitilis</i>        | WP_010982381  | Type I thioesterase domain | P  |  |
| Pikromycin_TEI<br><i>Streptomyces venezuelae</i>         | AAC69332      | Type I thioesterase domain | P  |  |
| DEBS_TEI<br><i>Saccharopolyspora erythraea</i>           | WP_011873139  | Type I thioesterase domain | P  |  |
| Meilingmycin_TEI<br><i>Streptomyces nanchangensi</i>     | ADC45535      | Type I thioesterase domain | P  |  |
| Lankamycin_TEI<br><i>Streptomyces rochei</i>             | BAC76491      | Type I thioesterase domain | P  |  |
| Curacin_A_TEI<br><i>Moorena producens</i> 19L            | ACV42478      | Type I thioesterase domain | P  |  |
| Mycinamicin_II_TEI<br><i>Micromonospora griseorubida</i> | BAC57032      | Type I thioesterase domain | P  |  |
| Natamycin_TEI<br><i>Streptomyces chattanoogensis</i>     | ADX66459      | Type I thioesterase domain | P  |  |
| Aureothin_TEI<br><i>Streptomyces thioluteus</i>          | CAE02606      | Type I thioesterase domain | P  |  |
| Bacitracin_TEI<br><i>Bacillus licheniformis</i>          | O68008        | Type I thioesterase domain | N  |  |
| Lichenysin_TEI<br><i>Bacillus licheniformis</i>          | CAA06325      | Type I thioesterase domain | N  |  |
| Surfactin_TEI<br><i>Bacillus subtilis</i>                | 1JMK_C        | Type I thioesterase domain | N  |  |
| Tyrocidine_TEI<br><i>Bacillus brevis</i>                 | O30409        | Type I thioesterase domain | N  |  |
| Fengycin_TEI<br><i>Bacillus subtilis</i>                 | AAB00093      | Type I thioesterase domain | N  |  |
| Mycosubtilin_TEI<br><i>Bacillus subtilis</i>             | Q9R9I9        | Type I thioesterase domain | N  |  |
| Bacillorin_TEI<br><i>Bacillus subtilis</i>               | WP_007410142  | Type I thioesterase domain | N  |  |
| Iturin_TEI<br><i>Bacillus subtilis</i>                   | ABY89500      | Type I thioesterase domain | N  |  |
| Cephalosporin_C_TEI<br><i>Acremonium chrysogenum</i>     | KFH48607      | Type I thioesterase domain | N  |  |
| Isocomplestatin_TEI<br><i>Streptomyces lavendulae</i>    | AAK81827      | Type I thioesterase domain | N  |  |

# RSC Chemical Biology

|                                                               |              |                                        |                               |                                                                                                                              |
|---------------------------------------------------------------|--------------|----------------------------------------|-------------------------------|------------------------------------------------------------------------------------------------------------------------------|
| Echinomycin_TEI<br><i>Streptomyces lasalocidi</i>             | BAE98156     | Type I thioesterase domain             | N                             |                                                                                                                              |
| A54145_TEI<br><i>Streptomyces fradiae</i>                     | AAZ23078     | Type I thioesterase domain             | N                             |                                                                                                                              |
| Daptomycin_TEI<br><i>Streptomyces filamentosus</i>            | AAX31559     | Type I thioesterase domain             | N                             |                                                                                                                              |
| Enduracidin_TEI-B<br><i>Streptomyces fungicidicus</i>         | ABD65958     | Type I thioesterase domain             | N                             | C-A-T-C-A-T-C-A-T-C-A-T-C-A-T-C-A-T-TE-TE                                                                                    |
| Teixobactin TE1-B<br><i>Eleftheria terrae</i>                 | AJF34464     | Type I thioesterase domain             | N                             | C-A-T-C-C-A-T-C-A-T-C-A-T-C-A-T-TE-TE                                                                                        |
| Arthrofactin A TE1-B<br><i>Pseudomonas</i> sp. MIS38          | BAC67536     | Type I thioesterase domain             | N                             | C-A-T-C-C-A-T-C-A-T-C-A-T-C-A-T-TE-TE                                                                                        |
| Massetolide A TE1-B<br><i>Pseudomonas fluorescens</i>         | ABH06369     | Type I thioesterase domain             | N                             | C-A-T-C-A-T-C-A-T-TE-TE                                                                                                      |
| Lysobactin TE1-B<br><i>Lysobacter</i> sp. ATCC 53042          | AEH59100     | Type I thioesterase domain             | N                             | C-A-T-C-A-T-C-A-T-C-C-A-T-C-A-T-C-A-T-C-A-T-TE-TE                                                                            |
| Syringopeptin_TEI-B<br><i>Pseudomonas syringae</i>            | AAO72425     | Type I thioesterase domain             | N                             | C-A-T-C-A-T-C-A-T-C-A-T-C-A-T-C-A-T-C-A-T-C-A-T-C-A-T-C-A-T-TE-TE                                                            |
| Myxothiazol_TEI<br><i>Stigmatella aurantiaca</i> DW4/3-1      | AAF19815     | Type I thioesterase domain             | PN                            |                                                                                                                              |
| Tubulysin_TEI<br><i>Archangium disciforme</i>                 | CAF05651     | Type I thioesterase domain             | PN                            |                                                                                                                              |
| Chondramid_TEI<br><i>Chondromyces crocatus</i>                | Q0VZ70       | Type I thioesterase domain             | PN                            |                                                                                                                              |
| Cryptophycin_TEI<br><i>Nostoc</i> sp. ATCC 53789              | ABM21572     | Type I thioesterase domain             | PN                            |                                                                                                                              |
| Hectochlorin_TEI<br><i>Lyngbya majuscula</i>                  | AAY42398     | Type I thioesterase domain             | PN                            |                                                                                                                              |
| Cylindrocyclophane_TEI<br><i>Cylindrospermum licheniforme</i> | AFV96142     | Type I thioesterase domain             | P<br>TEII-like <sup>1</sup>   |                                                                                                                              |
| Jerangolid_TEI<br><i>Sorangium cellulosum</i>                 | ABK32291     | Type I thioesterase domain             | P<br>TEII-like <sup>1,2</sup> |                                                                                                                              |
| Ajudazol_TEI<br><i>Chondromyces crocatus</i>                  | CAQ18835     | Type I thioesterase domain             | PN<br>TEII-like <sup>3</sup>  |                                                                                                                              |
| Legioliulin_TEI<br><i>Legionella parisiensis</i>              | AIU36104     | Type I thioesterase domain             | P<br>TEII-like <sup>4</sup>   |                                                                                                                              |
| Enduracidin_TEI-A<br><i>Streptomyces fungicidicus</i>         | ABD65958     | Other non-terminal thioesterase domain | N                             | C-A-T-C-A-T-C-A-T-C-A-T-C-A-T-C-A-T-C-A-T-C-A-T-C-A-T-TE-TE                                                                  |
| Teixobactin TE1-A<br><i>Eleftheria terrae</i>                 | AJF34464     | Other non-terminal thioesterase domain | N                             | C-A-T-C-C-A-T-C-A-T-C-A-T-C-A-T-TE-TE                                                                                        |
| Arthrofactin A TE1-A<br><i>Pseudomonas</i> sp. MIS38          | BAC67536     | Other non-terminal thioesterase domain | N                             | C-A-T-C-C-A-T-C-A-T-C-A-T-C-A-T-TE-TE                                                                                        |
| Massetolide A TE1-A<br><i>Pseudomonas fluorescens</i>         | ABH06369     | Other non-terminal thioesterase domain | N                             | C-A-T-C-A-T-C-A-T-TE-TE                                                                                                      |
| Lysobactin TE1-A<br><i>Lysobacter</i> sp. ATCC 53042          | AEH59100     | Other non-terminal thioesterase domain | N                             | C-A-T-C-A-T-C-A-T-C-C-A-T-C-A-T-C-A-T-C-A-T-TE-TE                                                                            |
| Syringopeptin_TEI-B<br><i>Pseudomonas syringae</i>            | AAO72425     | Other non-terminal thioesterase domain | N                             | C-A-T-C-A-T-C-A-T-C-A-T-C-A-T-C-A-T-C-A-T-C-A-T-C-A-T-C-A-T-TE-TE                                                            |
| Non-terminal TE1<br><i>Mesorhizobium</i> sp. L48C026A00       | WP_023803946 | Other non-terminal thioesterase domain |                               | TE-A-T-KS-AT-T                                                                                                               |
| Non-terminal TE1<br><i>Clostridium</i> sp. CAG:411            | WP_022438322 | Other non-terminal thioesterase domain |                               | TE-A-KR-T-SDR                                                                                                                |
| Non-terminal TE1<br><i>Branchiostoma floridae</i>             | XP_002598380 | Other non-terminal thioesterase domain |                               | KS-AT-DH-ER-KR-T-TE-C-A                                                                                                      |
| Non-terminal TE1<br><i>Mesorhizobium</i> sp. WSM3224          | WP_027170255 | Other non-terminal thioesterase domain |                               | TE-A-T-KS-AT-T                                                                                                               |
| Non-terminal TE1<br><i>Coccomyxa subellipsoidea</i> C169      | XP_005650993 | Other non-terminal thioesterase domain |                               | KS-MT-MT-MT-MT-T-T-T-T-KS-KR-T-T-KS-DH-ERKR-T-T-KS-KR-T-KS-KR-TT-T-KS-KR-T-T-KS-KR-TKS-DH-KR-T-T-KS-DH-KRT-T-KS-KR-T-TE-T-TE |
| Non-terminal TE1<br><i>Mycobacterium abscessus</i>            | WP_025239395 | Other non-terminal thioesterase domain |                               | TE-KS-AT-T                                                                                                                   |
|                                                               | XP_002905400 | Other non-terminal thioesterase domain |                               | TE-A-T-SDR                                                                                                                   |

## RSC Chemical Biology

|                                                      |          |                                        |   |                                                        |
|------------------------------------------------------|----------|----------------------------------------|---|--------------------------------------------------------|
| FR901464 TE1<br><i>Pseudomonas</i> sp. 2663          | ADH01484 | Other non-terminal thioesterase domain | P | DH-KR-AT-ACP-KS-KR-ACP-KS-ACP-ACP- <b>TE</b> -KS-ACP-C |
| Obafluorin_TEI<br><i>Pseudomonas fluorescens</i>     | AQZ26587 | Other non-terminal thioesterase domain | N | C-A-T- <b>TE</b> -A                                    |
| FmoA5_TEI-1<br><i>Streptomyces</i> sp. Sp080513GE-23 | BAP16699 | Other non-terminal thioesterase domain | N | C-T- <b>TE</b> -TE-A-T                                 |
| FmoA5_TEI-2<br><i>Streptomyces</i> sp. Sp080513GE-23 | BAP16699 | Other non-terminal thioesterase domain | N | C-T-TE- <b>TE</b> -A-T                                 |

**Supplementary Table 1. Thioesterase sequences used to create a sequence similarity network.** The thioesterase sequences were divided into five groupings: 1) BurA TE-A from *Burkholderia thailandensis* (in bold) and the equivalent TE-A domains from BurA homologues encoded in other bacteria (yellow); 2) BurA TE-B from *Burkholderia thailandensis* (in bold) and the equivalent TE-B domains from BurA homologues encoded in other bacteria (orange); 3) Type II thioesterases (teal); 4) Type I thioesterase domains (blue); and 5) Other non-terminal thioesterase domains (magenta). Where known, the product class (polyketide: P, non-ribosomal peptide: N, or polyketide-non-ribosomal peptide hybrid: NP) of the pathway that contains the thioesterase is included.

| Primer name          | Sequence 5'-3'. Restriction sites are underlined, mutated residues are highlighted using red bold. |
|----------------------|----------------------------------------------------------------------------------------------------|
| S90A_OL1_Fw          | GATTACATCTAGAAATAATTTTGTTAACITTAAGAAGG                                                             |
| S90A_OL1_Rv          | CGTAGGCGAGCAGCGCGCCGAGGG <b>GC</b> GTGGCCGAACAGGAAGAAGGG                                           |
| S90A_OL2_Fw          | CCCTTCTCCTGTTTCGGCCAC <b>GC</b> CCTCGGCGCGCTGCTCGCTACG                                             |
| S90A_OL2_Rv          | GATTACAGAAATTCGCCGACGAGCGAATCGGGCCAGCTCTTTTCGAGC                                                   |
| S2023A_OL1_Fw        | GCCCGATTCTGCTCGTCGGCGAATTCGTCGCGAGCTGCCGCTCGCGC                                                    |
| S2023A_OL1_Rv        | CGCGGCCGCGCCCGGTAG <b>GC</b> CAGCCCGAGAACGCGACGGGCAGTTCCG                                          |
| S2023A_OL2_Fw        | CGAACTGCCGTCGCGTTCTGCGGGT <b>GC</b> CTACGCGCGCGCGCCGCG                                             |
| S2023A_OL2_Rv        | TCCTTCTGCGGCCGCAAGCTTCTACTCGTCCGCGATGCCGGCGACGT                                                    |
| S2749A_OL1_Fw        | ACTGGCTGATCGACGAGCAGCAGGTGCCGCC                                                                    |
| S2749A_OL1_Rv        | GCGCGAGATCGAGCG <b>C</b> ATCGAGCCGAGCG                                                             |
| S2749A_OL2_Fw        | CGCTCGGGCTCGAT <b>GC</b> GCTCGATCTCGCGC                                                            |
| S2749A_OL2_Rv        | CGACGGCCGCCGACCACCGGTCCCG                                                                          |
| pGEM_pbur_S90A_Up_Fw | TGAACCACCAAGTCTGTGGAGGTACCATGAGGCAAATAGTTTCAACG                                                    |
| pGEM_pbur_S90A_Up_Rv | CGTAGGCGAGCAGCGCGCCGAGGG <b>GC</b> GTGGCCGAACAGGAAGAAGGG                                           |
| pGEM_pbur_S90A_Dn_Fw | CCCTTCTCCTGTTTCGGCCAC <b>GC</b> CCTCGGCGCGCTGCTCGCTACG                                             |
| pGEM_pbur_S90A_Dn_Rv | AAGCTATGCATCCAACGCGTTGGGAGCTCTCCCATATGGTCGACCTGC                                                   |
| pET28a_TE-B_Fw       | GATTACACATATGTCATGCAACGGCGGACATGA                                                                  |
| pET28a_TE-B_Rv       | ATATATATATAAAGCTTATCACAGCCACGCGGCCACGCGCGCGA                                                       |
| Tet_rv               | CGGTGCCGAGGATGACGATG                                                                               |
| II2087rvConf         | CGAAGATCACGTCGTCGCCG                                                                               |

**Supplementary Table 2. Oligonucleotide primers used in this study.**

| Plasmid               | Description                                                                                                     | Source     |
|-----------------------|-----------------------------------------------------------------------------------------------------------------|------------|
| pHis8_svp             | <i>E. coli</i> expression vector with His8-tag and svp; KanR                                                    | [5,6]      |
| pHis8_svp_burA        | pHis8-svp containing burA; KanR                                                                                 | [7]        |
| pHis8_svp_burA_S90A   | pHis8-svp containing burA S90A; KanR                                                                            | This study |
| pHis8_svp_burA_S2023A | pHis8-svp containing burA S2023A; KanR                                                                          | This study |
| pHis8_svp_burA_S2749A | pHis8-svp containing burA S2729A; KanR                                                                          | This study |
| pET-28(+)             | <i>E. coli</i> expression vector with a His6-tag; KanR                                                          | Novagen    |
| pET-28(+) TE-B        | <i>E. coli</i> expression vector containing a His6-tagged TE-B domain; KanR                                     | This study |
| pET-28(+)TE-B S2023A  | <i>E. coli</i> expression vector containing a His6-tagged TE-B S2023A domain; KanR                              | This study |
| pGEM_pbur             | pGEM-easy vector for integrating PthaA promoter upstream of burA in <i>B. thailandensis</i> .                   | [8]        |
| pGEM_pbur_S90A        | pGEM-easy vector for integrating PthaA promoter upstream of burA and also introducing an S90A mutation in burA. | This study |

Supplementary Table 3. Plasmids used in this study.

| Name                                                           | Description                                                                                                        | Source              |
|----------------------------------------------------------------|--------------------------------------------------------------------------------------------------------------------|---------------------|
| <i>E. coli</i> TOP10                                           | General cloning host strain                                                                                        | Invitrogen          |
| <i>E. coli</i> Rosetta2 ( $\lambda$ DE3)                       | Protein expression host strain containing tRNAs for rare codons; CmR                                               | Novagen             |
| <i>E. coli</i> BL21 ( $\lambda$ DE3)                           | Protein expression host                                                                                            | New England Biolabs |
| <i>E. coli</i> BL21 ( $\lambda$ DE3) TE-B                      | Heterologous expression host for pET-28(+) TE-B                                                                    | This study          |
| <i>E. coli</i> BL21 ( $\lambda$ DE3) TE-B S2023A               | Heterologous expression host for pET-28(+) TE-B S2023A                                                             | This study          |
| <i>E. coli</i> Rosetta2 ( $\lambda$ DE3) pHis8_svp_burA_S90A   | Heterologous expression host for pHis8_svp_burA_S90A                                                               | This study          |
| <i>E. coli</i> Rosetta2 ( $\lambda$ DE3) pHis8_svp_burA_S2023A | Heterologous expression host for pHis8_svp_burA_S2023A                                                             | This study          |
| <i>E. coli</i> Rosetta2 ( $\lambda$ DE3) pHis8_svp_burA_S2749A | Heterologous expression host for pHis8_svp_burA_S2749A                                                             | This study          |
| <i>B. thailandensis</i> E264                                   | Prototroph; environmental isolate                                                                                  | DSMZ                |
| <i>B. thailandensis</i> E264 Pbur                              | The promotor of <i>burA</i> was exchanged with $\Delta$ PthaA;TetR                                                 | [8]                 |
| <i>B. thailandensis</i> E264 Pbur S90A                         | The promotor of <i>burA</i> was exchanged with $\Delta$ PthaA;TetR. An S90A mutation is present within <i>burA</i> | This study          |

Supplementary Table 4. Strains used in this study.



Supplementary Figures

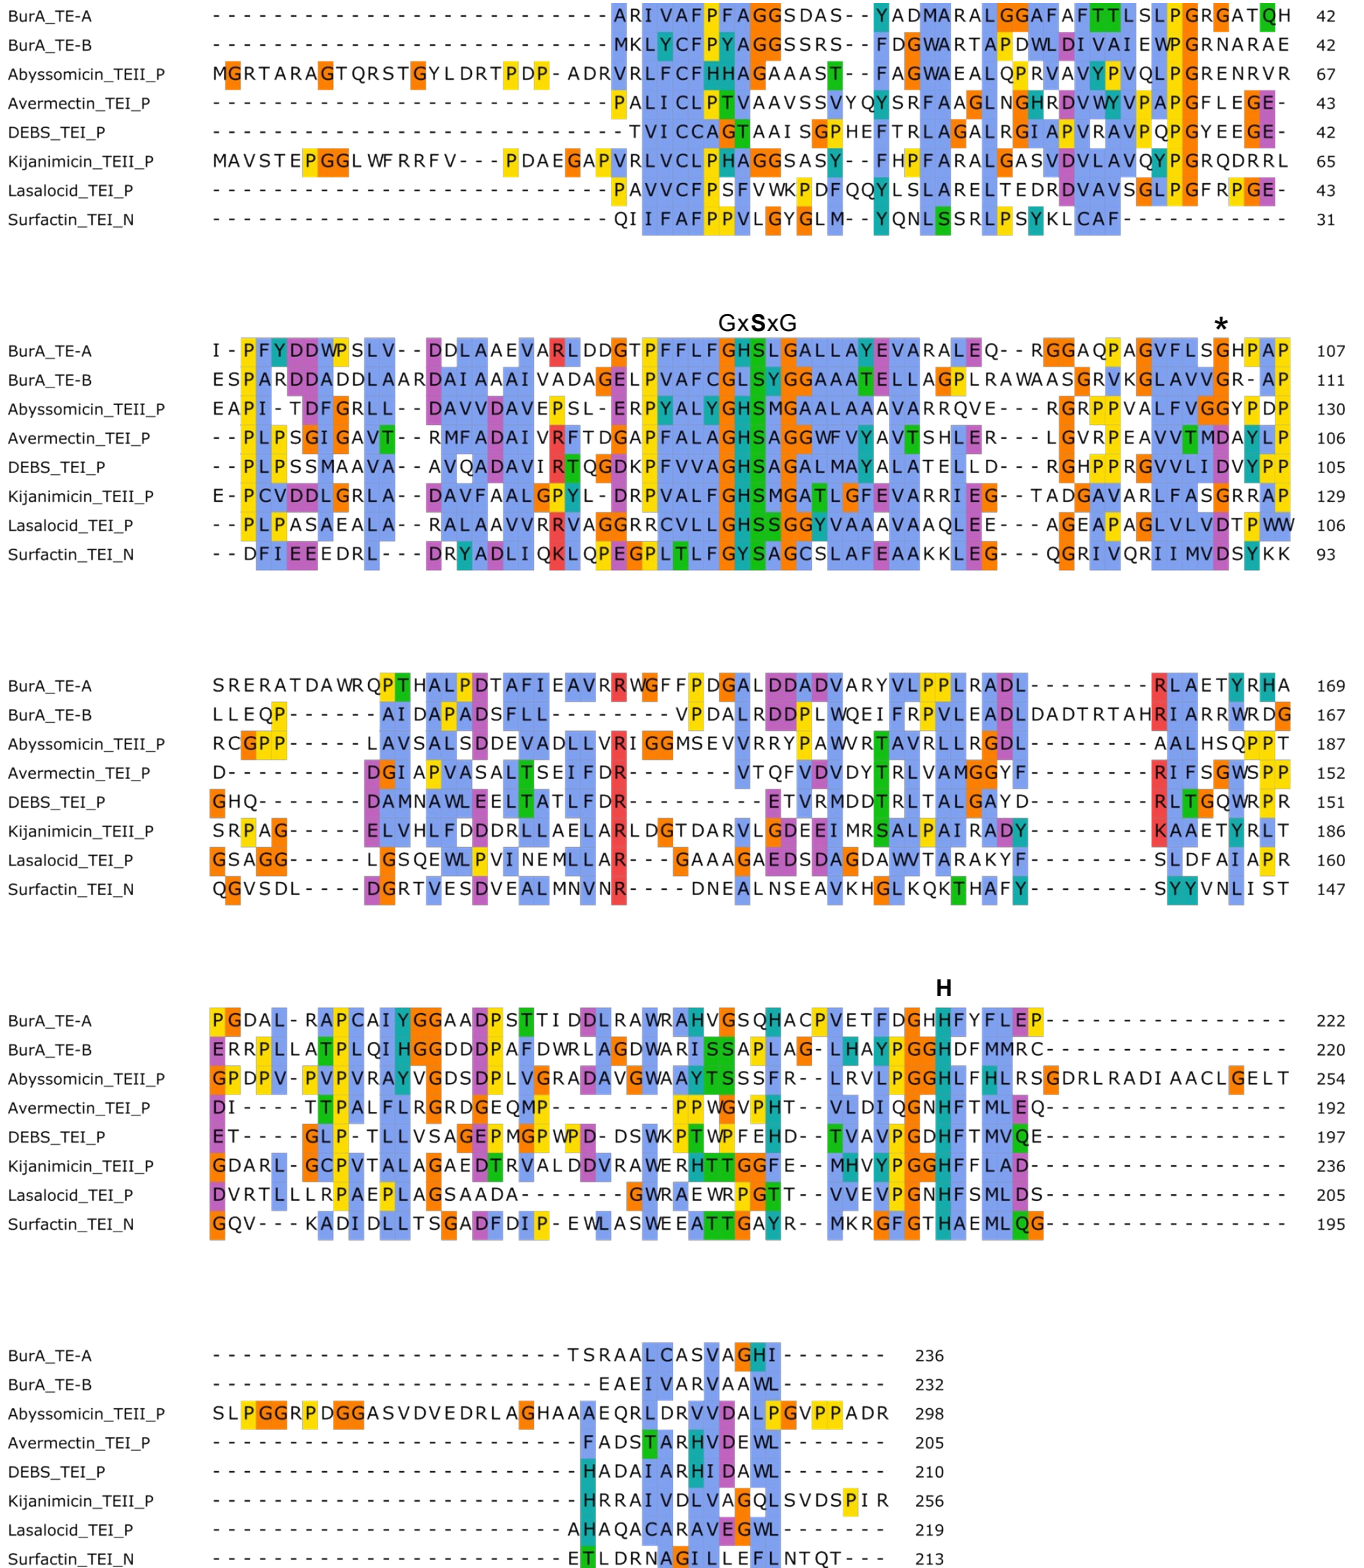

**Supplementary Figure 1.** Alignment of BurA TE-A, BurA TE-B, with other Type I thioesterase domains and Type II thioesterases. Alignment was made using MUSCLE<sup>9</sup>. The active site Ser and His residues are highlighted using the corresponding letter. The location of the conserved active site Asp is highlighted using an asterisk (\*). Chemically similar or identical amino acids in an alignment are coloured accordingly: Blue, hydrophobic; Green, polar; Purple, negative; Red, positive; Yellow, proline; Orange, Gly.

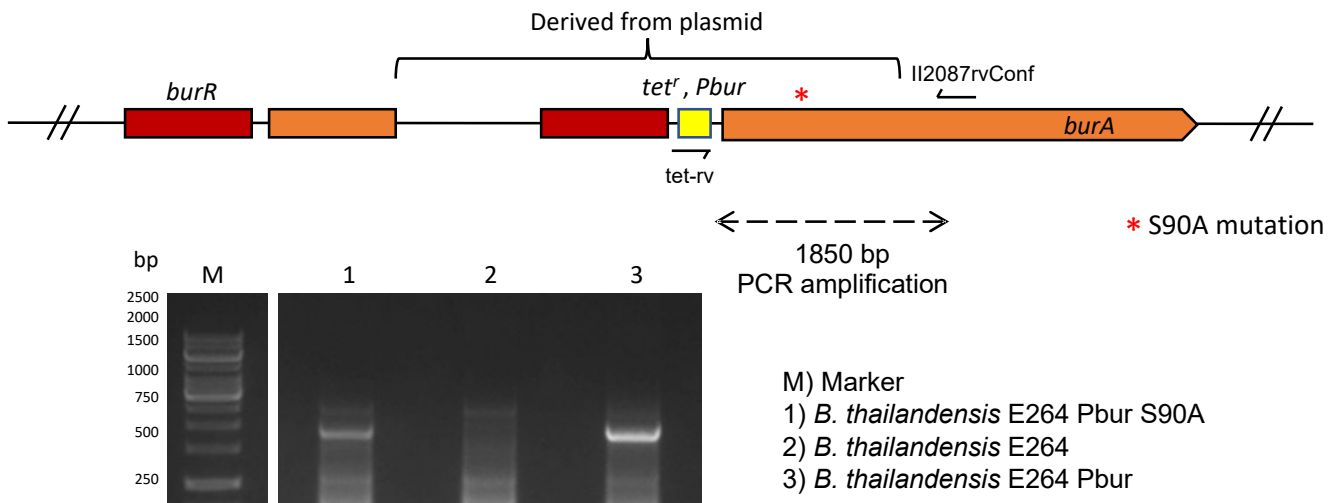

**Supplementary Figure 2.** Creation of a *B. thailandensis* E264 *burA* S90A mutant. The plasmid pGEM\_*pbur\_S90A* was transformed into *B. thailandensis* E264 by electroporation. Tetracycline resistant colonies were then screened using *tet-rv* and *I12087rv\_Conf* primers (product size 1850 bp) to confirm that the desired plasmid integration had occurred, which simultaneously introduced the PTha<sup>8</sup> promoter upstream of *burA* and introduced an S90A mutation into *burA*.

A

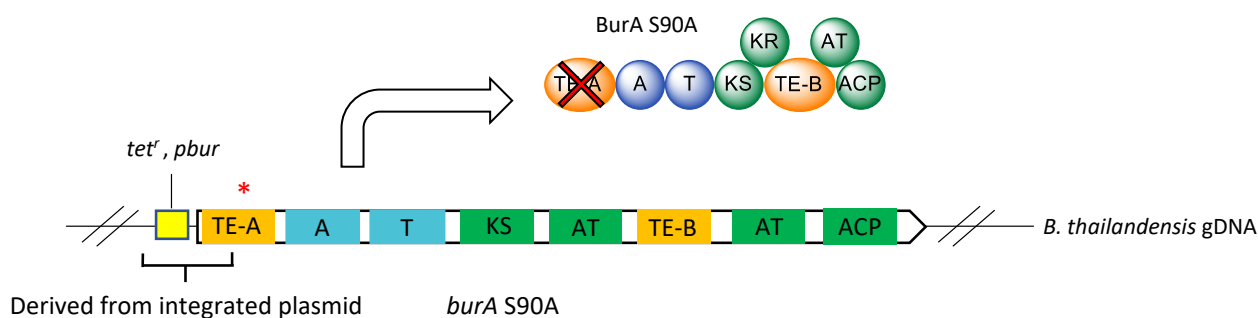

B

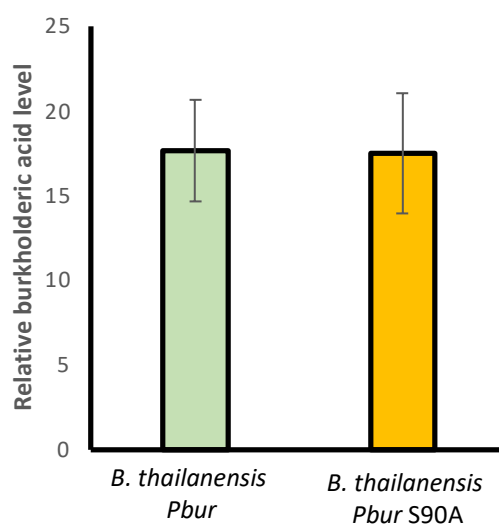

Sup

**plementary Figure 3.** Mutating TE-A in *B. thailandensis* E264. A) The desired S90A mutation in of *burA* TE-A was made in wild type *B. thailandensis* by transforming the plasmid pGEM\_*pbur*\_S90A. In addition to integrating a strong promoter upstream of *burA*, necessary for activating the *bur* cluster, pGEM\_*pbur*\_S90A also had a homology arm fragment to overwrite the 5' end of *burA* to add the S90A mutation in the gene region corresponding to TE-A. B) Levels of the highly UV absorbing burkholderic acid (Absorbance 370 nm) were unchanged in the *B. thailandensis* TE-A S90A mutant compared to the wild type. Burkholderic acid level is relative to a caffeine internal standard (Abs 270 nm). Data representative of three independent experiments.

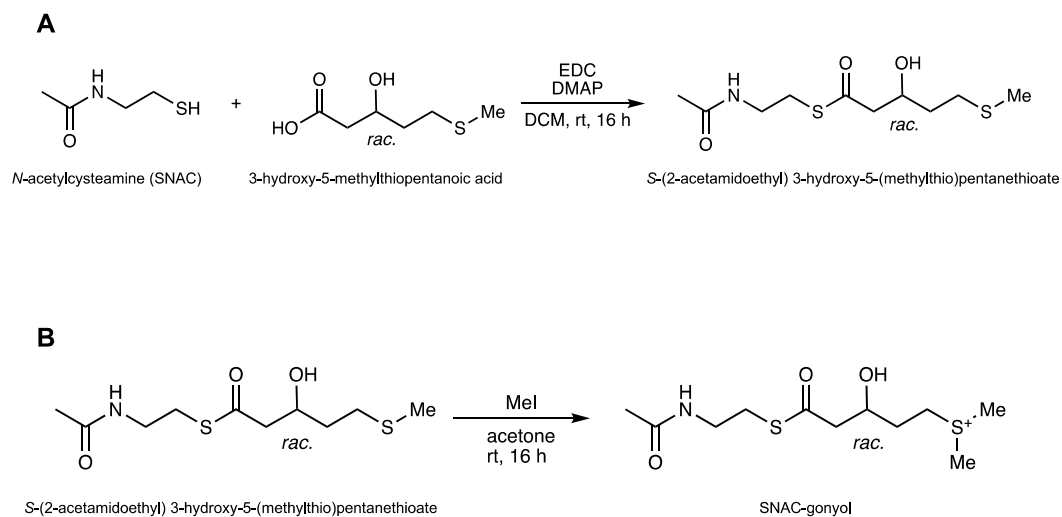

**Supplementary Figure 4.** A) Synthetic route to form racemic (2-acetamidoethyl) 3-hydroxy-5-(methylthio)pentanethioate, the precursor of racemic SNAC-gonyol. B) Synthetic route to form racemic SNAC-gonyol.

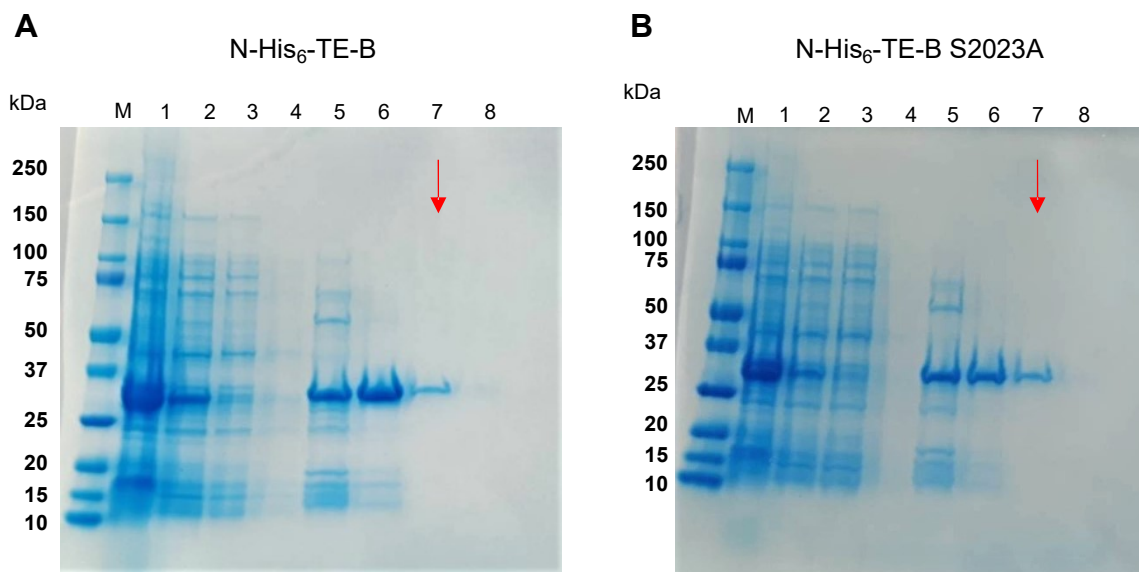

**Supplementary Figure 5.** Metal Affinity Purification of BurA TE-B and BurA TE-B S2023A. The gene region encoding **A.** the TE-B domain of BurA or **B.** were cloned into pET-28a in frame with an N-terminal His<sub>6</sub>-tag. The TE-B protein was then purified using cobalt resin affinity chromatography. Each lane on the SDS-PAGE gel contains a different fraction from the purification. M) Protein marker ladder—Precision Plus Dual Colour (Bio-Rad). 1) Insoluble fraction. 2) soluble fraction. 3) Column flow-through. 4) Fraction from 20 mM TrisCl pH 7.9, 0.5 M NaCl, 10 % glycerol. 5) Fraction from 20 mM TrisCl pH 7.9, 0.5 M NaCl, 10 % glycerol, 50 mM imidazole. 6) Fraction from 20 mM TrisCl pH 7.9, 0.5 M NaCl, 10 % glycerol, 100 mM imidazole. 7) Fraction from 20 mM TrisCl pH 7.9, 0.5 M NaCl, 10 % glycerol, 200 mM imidazole. 8) Fraction from 20 mM TrisCl pH 7.9, 0.5 M NaCl, 10 % glycerol, 400 mM imidazole. The arrow highlights the lane corresponding to the elution fraction highly enriched for TE-B/TE-B S2023A. The theoretical mass of TE-B and TE-B S2023A is 31 kDa.

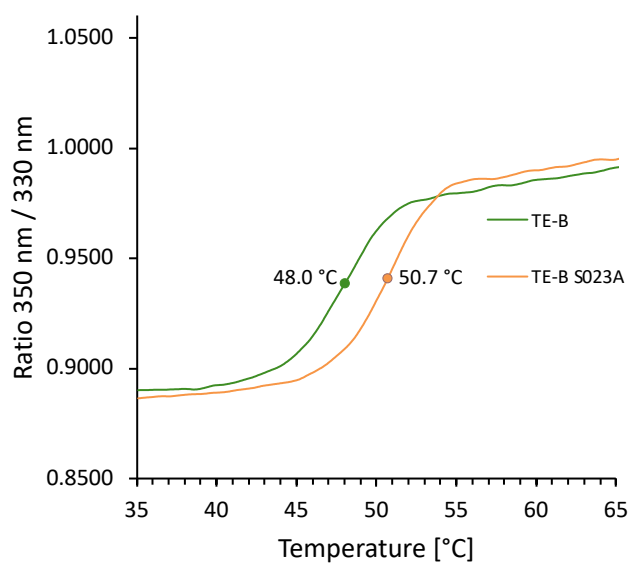

**Supplementary Figure 6.** The melting temperatures of purified TE-B and TE-B S2023A. The melting temperature of the mutant was very similar to the wild type.

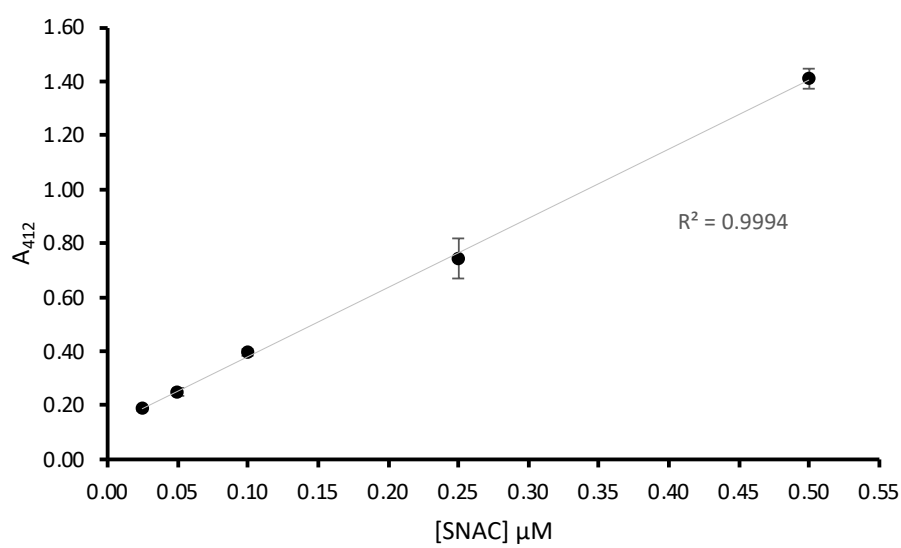

**Supplementary Figure 7.** SNAC standard curve used for the Ellman's reagent assay of TE-B. Different concentrations of SNAC were incubated in triplicate each with 10  $\mu\text{M}$  (saturating) of Ellman's reagent, followed by measuring the absorbance at 412 nm.

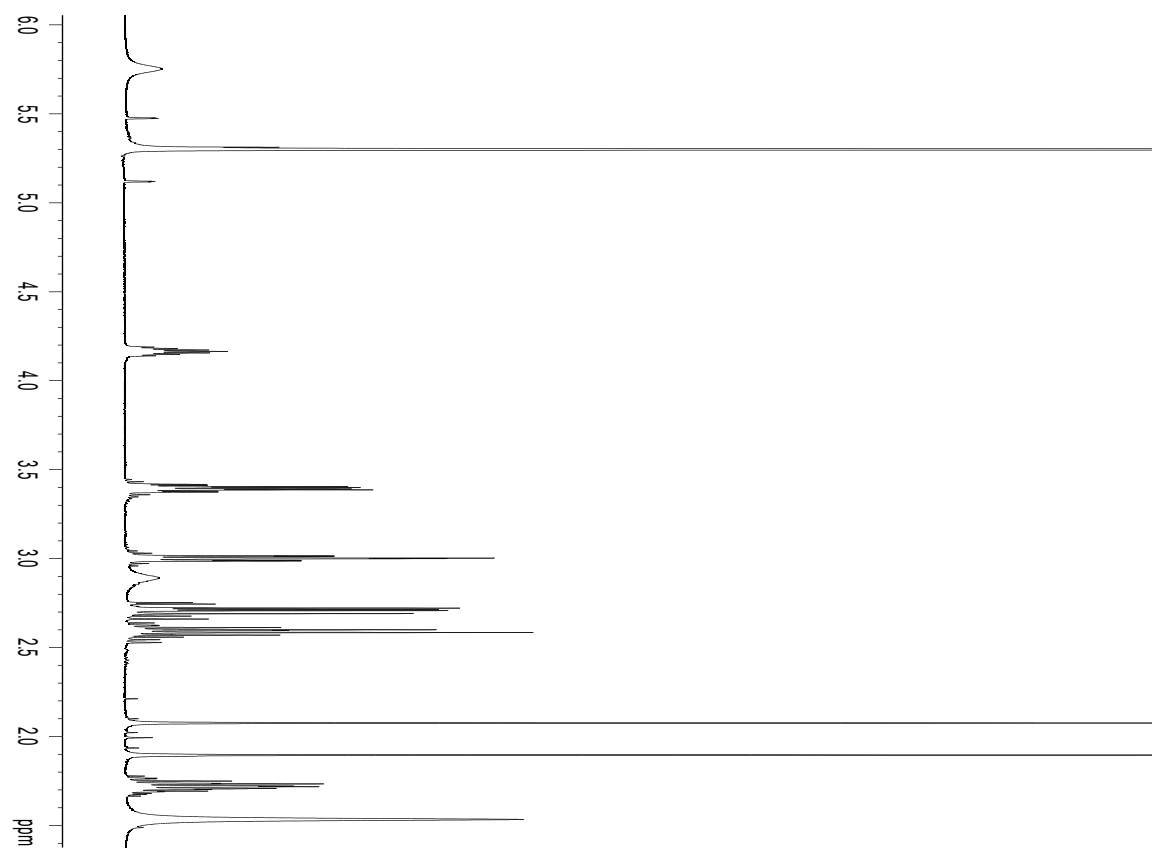

**Supplementary Figure 8.** <sup>1</sup>H NMR spectrum of racemic (2-acetamidoethyl) 3-hydroxy-5-(methylthio)pentanethioate (CD<sub>2</sub>Cl<sub>2</sub>).



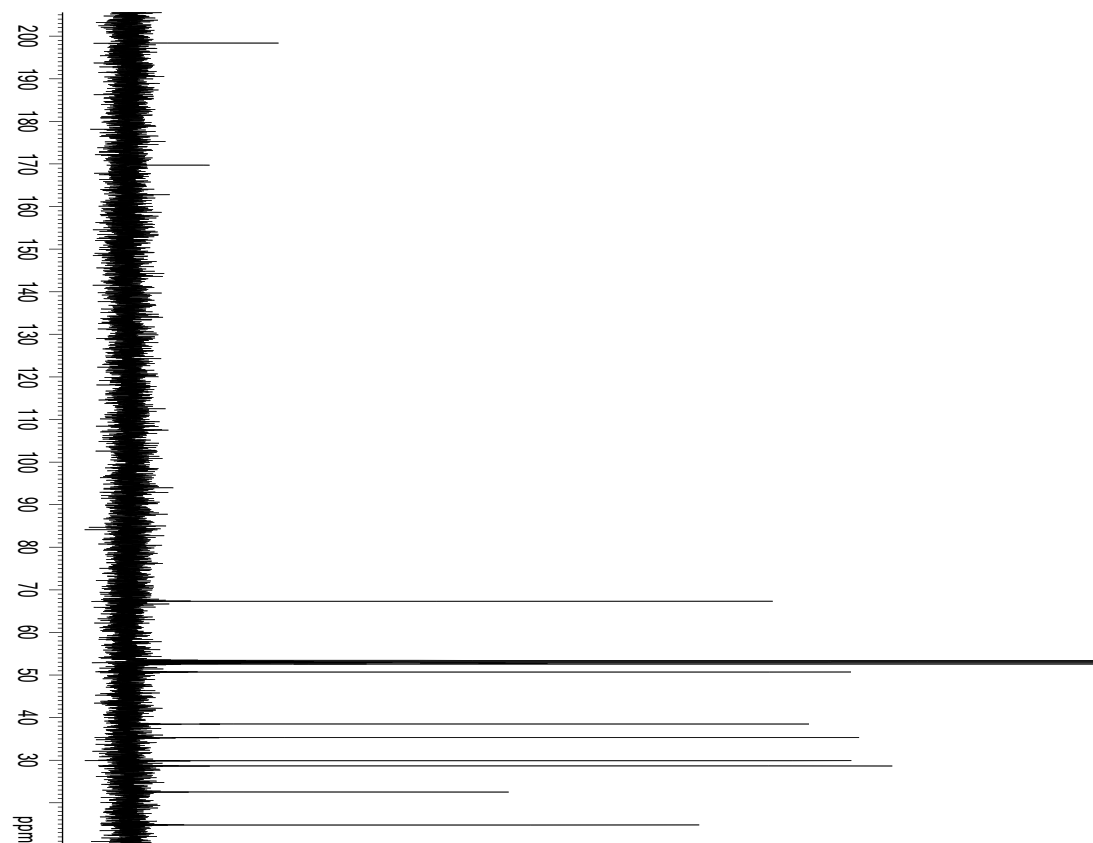

**Supplementary Figure 9.**  $^{13}\text{C}$  NMR spectrum of racemic (2-acetamidoethyl) 3-hydroxy-5-(methylthio)pentanethioate ( $\text{CD}_2\text{Cl}_2$ ).



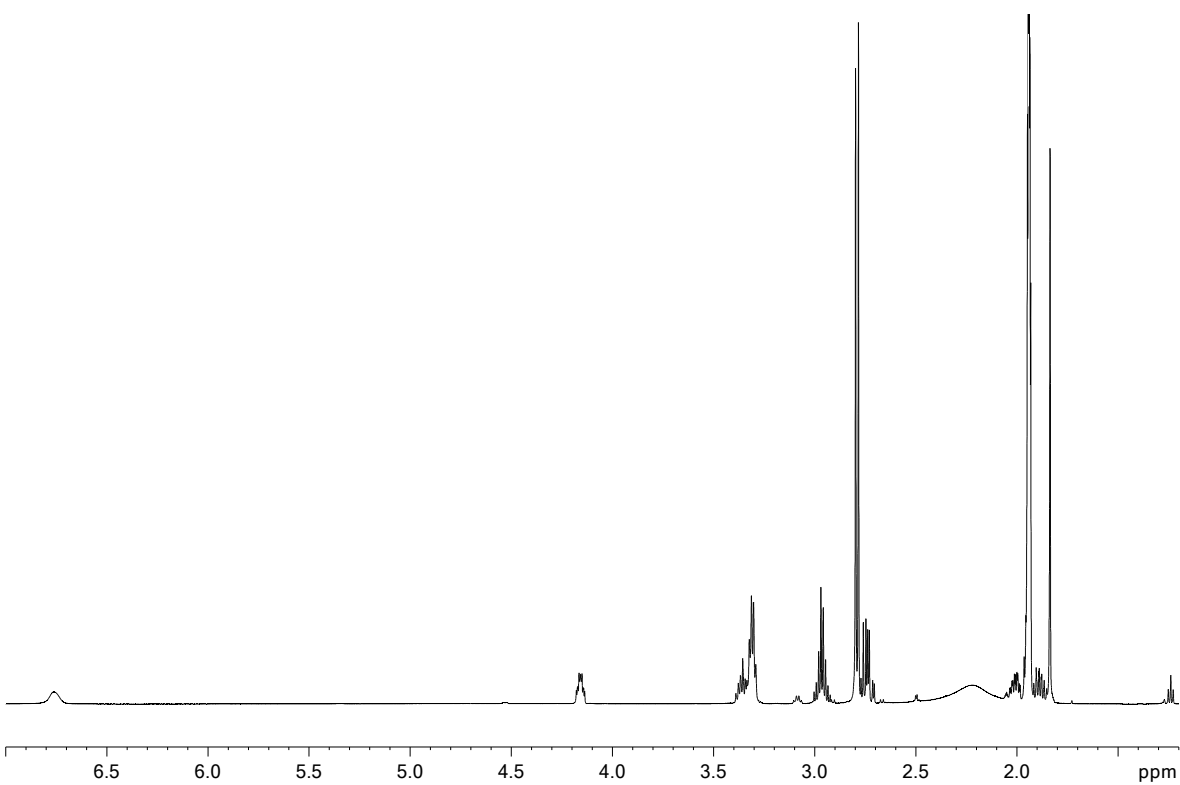

**Supplementary Figure 10.** Full <sup>1</sup>H NMR spectrum of racemic gonyol SNAC thioester (CD<sub>3</sub>CN).

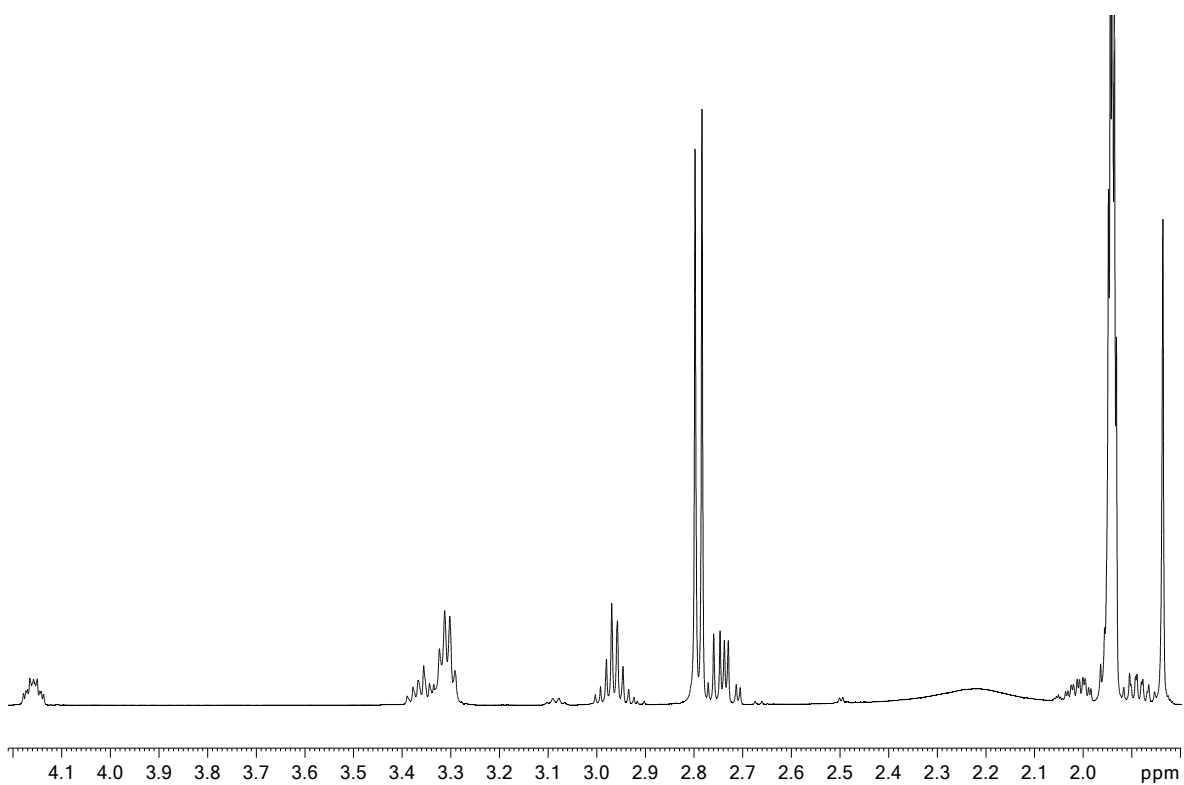

**Supplementary Figure 11.** Enlarged  $^1\text{H}$  NMR spectrum of racemic gonyol SNAC thioester ( $\text{CD}_3\text{CN}$ ).



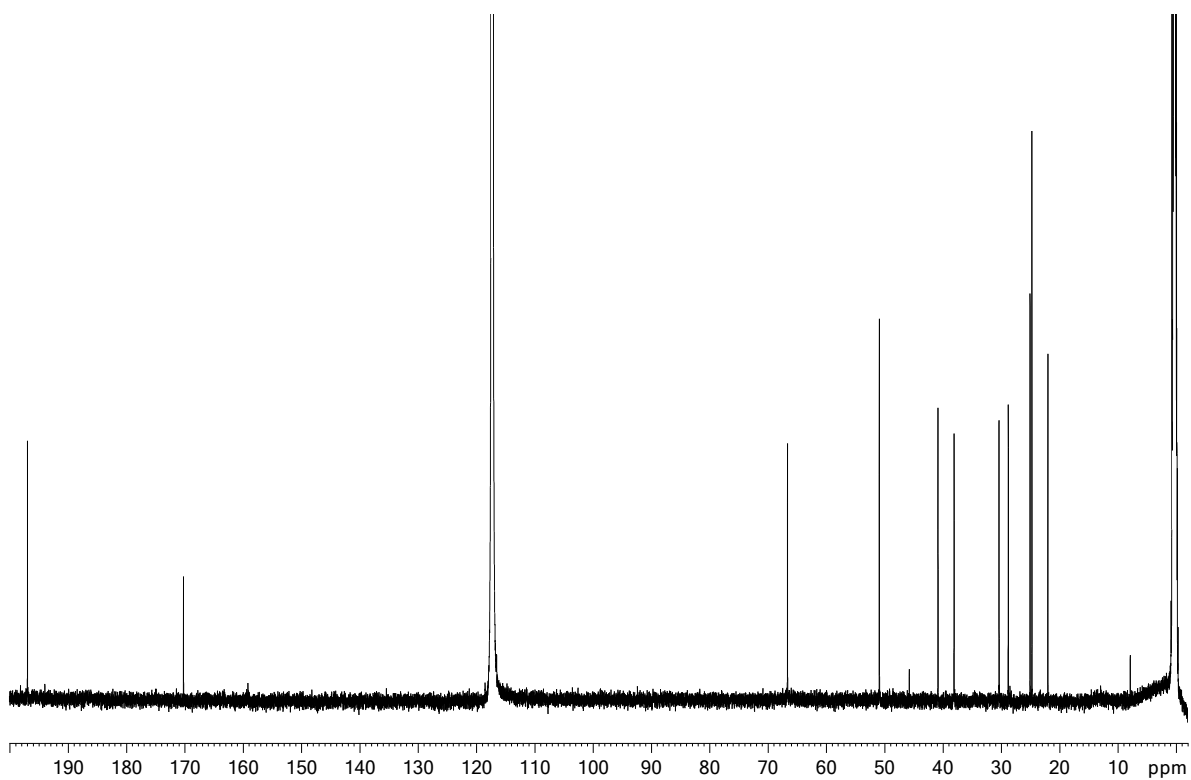

**Supplementary Figure 12.** Full  $^{13}\text{C}$  NMR spectrum of racemic gonyol SNAC thioester ( $\text{CD}_3\text{CN}$ ).

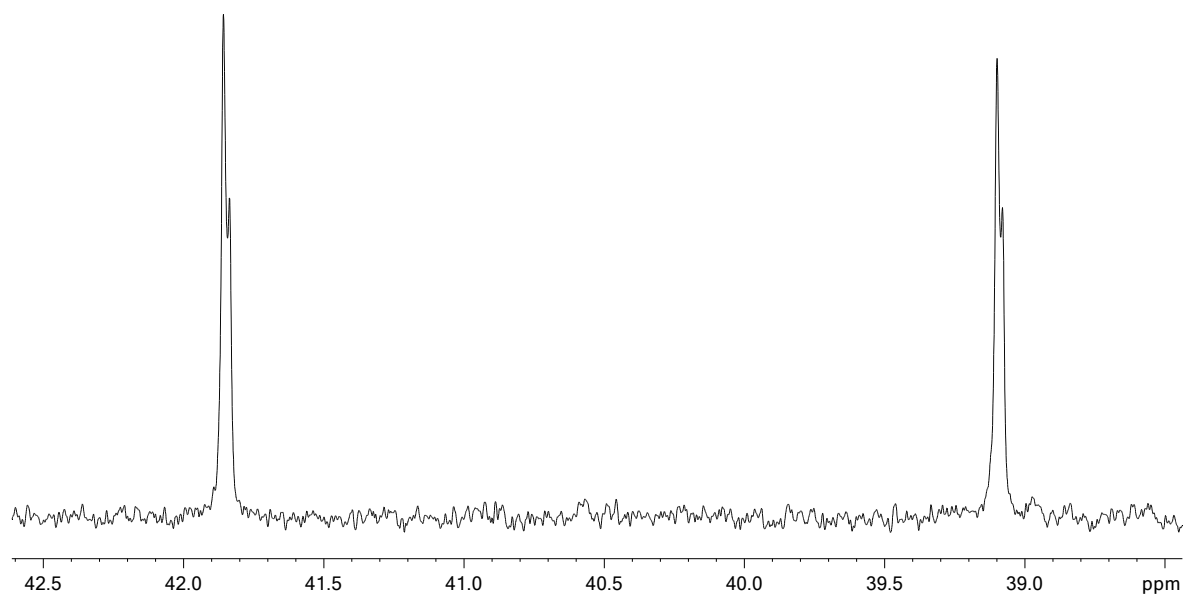

**Supplementary Figure 13.** Enlarged  $^{13}\text{C}$  NMR spectrum of racemic gonyol SNAC thioester ( $\text{CD}_3\text{CN}$ ).

### Supplementary References

1. H. Nakamura, J. X. Wang and E. P. Balskus, *Chem. Sci.*, 2015, **6**, 3816-3822.
2. B. Julien, Z.-Q. Tian, R. Reid and C. D. Reeves, *Chem. Biol.*, 2006, **13**, 1277-1286.
3. K. Buntin, K. J. Weissman and R. Müller, *ChemBioChem*, 2010, **11**, 1137-1146.
4. T. Ahrendt, M. Miltenberger, I. Haneburger, F. Kirchner, M. Kronenwerth, A. O. Brachmann, H. Hilbi and H. B. Bode, *ChemBioChem*, 2013, **14**, 1415-1418.
5. J. M. Jez, J.-L. Ferrer, M. E. Bowman, R. A. Dixon and J. P. Noel, *Biochem.*, 2000, **39**, 890-902.
6. C. Sánchez, L. Du, D. J. Edwards, M. D. Toney and B. Shen, *Chem. Biol.*, 2001, **8**, 725-738.
7. F. Trottmann, K. Ishida, J. Franke, A. Stanišić, M. Ishida-Ito, H. Kries, G. Pohnert and C. Hertweck, *Angew. Chem. Int. Ed.*, 2020, **59**, 13511-13515.
8. J. Franke, K. Ishida and C. Hertweck, *Angew. Chem. Int. Ed.*, 2012, **51**, 11611-11615.
9. R. C. Edgar, *BMC Bioinform.*, 2004, **5**, 113.
